# Supplementary material
Source: PubMed Central journal article supplement (PMC10879945)
Supplement: jama-e2327005-s002.pdf [file jama-e2327005-s002.pdf]

## Data Sharing Statement

Graetz. Examining Excess Mortality Associated With the COVID-19 Pandemic for Renters Threatened With Eviction. *JAMA*. Published February 20, 2024. doi:10.1001/jama.2023.27005

### Data

**Data available:** No

### Additional Information

**Explanation for why data not available:** All our empirical results use confidential microdata from the U.S. Census Bureau. We will not be able to make the data directly available to the journal in the event our paper is accepted for publication. However, we can provide the code and researchers can follow the directions on how to write a proposal to gain access to the data via a Federal Statistical Research Data Center using the Standard Application Process.
